# Supplementary material for: Nitrogen-doped hollow carbon nanospheres towards the application of potassium ion storage
Source: Royal Society of Chemistry journal article supplement (doi:10.1039/c9ta05205d), 2019-01-01
Supplement: c9ta05205d1.pdf [file c9ta05205d1.pdf]

Electronic Supplementary Material (ESI) for Journal of Materials Chemistry A. This journal is © The Royal Society of Chemistry 2019

## Supplementary Information

### **Nitrogen-Doped Hollow Carbon Nanosphere Towards Application of Potassium Ion Storage**

*Jiafeng Ruan,<sup>a,1</sup> Xi Wu,<sup>a,1</sup> Yan Wang,<sup>a</sup> Shiyong Zheng,<sup>b</sup> Dalin Sun,<sup>a</sup> Yun Song,<sup>a,\*</sup> Min Chen<sup>a,\*</sup>*

<sup>a</sup> Department of Materials Science, Fudan University, Shanghai 200433 (P. R. China)

<sup>b</sup> School of Materials Science and Engineering, University of Shanghai for Science and Technology, Shanghai 200093, China

\*Corresponding author at: Department of Materials Science, Fudan University, Shanghai 200433 (P. R. China)

E-mail addresses: Chenmin@fudan.edu.cn; Songyun@fudan.edu.cn.

<sup>1</sup> These authors contributed equally to this work.

Content:

**Figure S1.** Zeta ( $\zeta$ ) potential of SiO<sub>2</sub>-NH<sub>2</sub> and Si.

**Figure S2.** TEM image of the SiO<sub>2</sub>-NH<sub>2</sub>@DA/Si.

**Figure S3.** (a, b) TEM images of N-CNs.

**Figure S4.** (a) XRD pattern and (b) Raman spectra of N-CNs.

**Figure S5.** Raman spectra of the N-HCNs

**Table S1.** Assignments and percentage composition in the C1s and N 1s regions of the N-HCNs.

**Figure S6.** The SEM images of N-HCNs.

**Figure S7.** The SEM images of N-HCNs: (a) pristine and (b) after 100 cycles.

**Figure S8.** initial three discharge/charge profiles of N-CNs at 0.05 A g<sup>-1</sup>

**Figure S9.** Initial two discharge/charge profiles of the N-HCNs based on the (a) cycle performance at 50 mA g<sup>-1</sup> and (b) rate performance at 50 mA g<sup>-1</sup>.

**Figure S10.** Comparison of rate capability of the N-HCNs and other carbonaceous materials in PIB.

**Figure S11.** CV curve with the pseudocapacitive fraction shown by the red region at a scan rate of (a) 5.0 mV s<sup>-1</sup> and (b) 10.0 mV s<sup>-1</sup>.

**Figure S12.** (e) Nyquist plots of N-HCNs at different potentials; (f) the liner relation of  $\omega^{1/2}$  vs.  $-Z''$ .

**Figure S13.** Electrochemical performance of commercial TiS<sub>2</sub> as PIBs cathodes in half cells: (a) CV curves within the voltage window of 1.5-3.0 V at a scan rate of 0.1 mV s<sup>-1</sup>; (b) initial three discharge/charge profiles at 0.1 A g<sup>-1</sup>; (c) rate capability of at current rates of 0.05, 0.1, 0.2, 0.5, 1.0 and 2.0 A g<sup>-1</sup>; (d) cycling property at 0.1 A g<sup>-1</sup>.

**Figure S14.** initial GDC profile of full-cell at 0.1 A g<sup>-1</sup>.

Figure S1

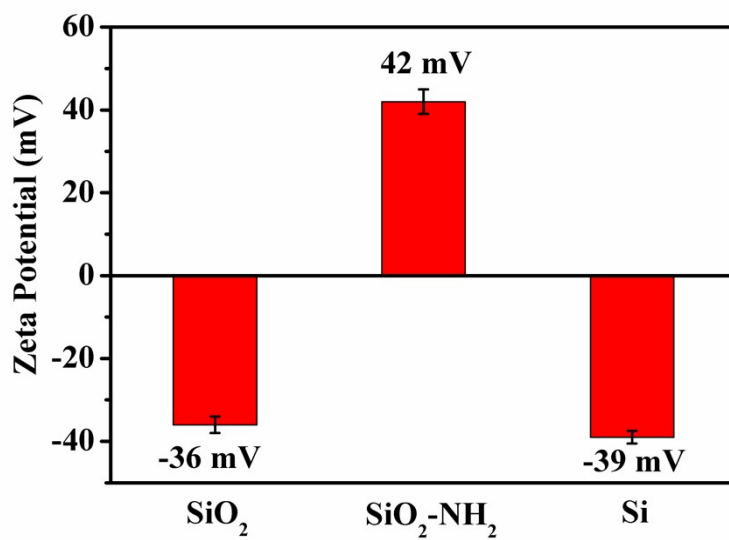

Figure S1. Zeta ( $\zeta$ ) potential of SiO<sub>2</sub>-NH<sub>2</sub> and Si.

**Figure S2**

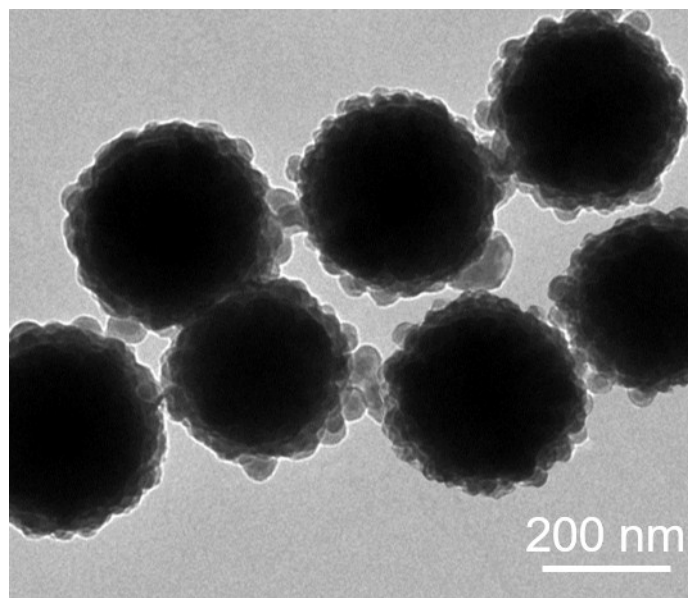

**Figure S2.** TEM image of the  $\text{SiO}_2\text{-NH}_2\text{@DA/Si}$ .

**Figure S3**

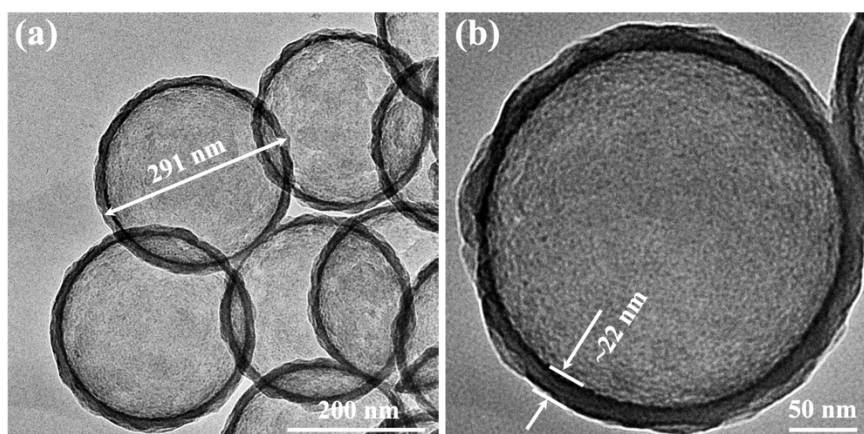

**Figure S3.** (a, b) TEM images of N-CNs.

Figure S4

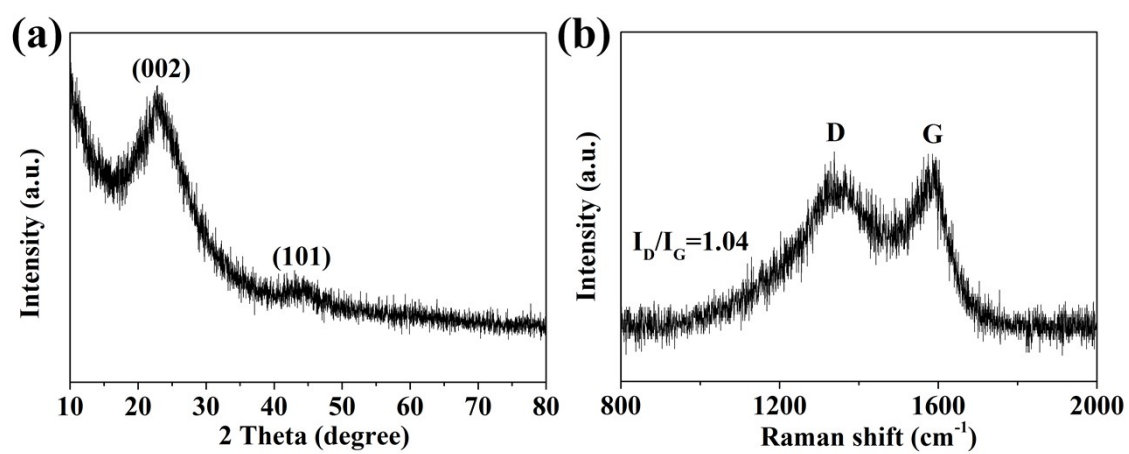

Figure S4. (a) XRD pattern and (b) Raman spectra of N-CNs.

Figure S5

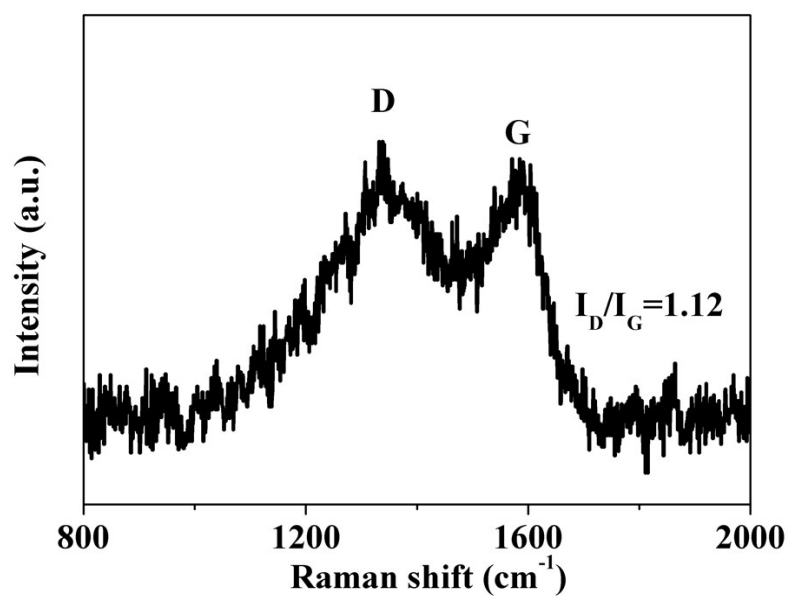

Figure S5. Raman spectra of the N-HCNs

**Table S1****Table S1.** Assignments and percentage composition in the C 1s and N 1s regions of the N-

HCNs

|      | functional group    | binding energy (eV) | ratios (%area) |
|------|---------------------|---------------------|----------------|
| C 1s | C-C sp <sup>2</sup> | 284.6               | 69.7           |
|      | C=N                 | 286.1               | 23.6           |
|      | C-N/C-O-C           | 288.2               | 6.7            |
| N 1s | pyridinic-N         | 398.6               | 53.4           |
|      | pyrrolic-N          | 400.0               | 22.6           |
|      | quaternary-N        | 401.0               | 24.0           |



**Figure S6**

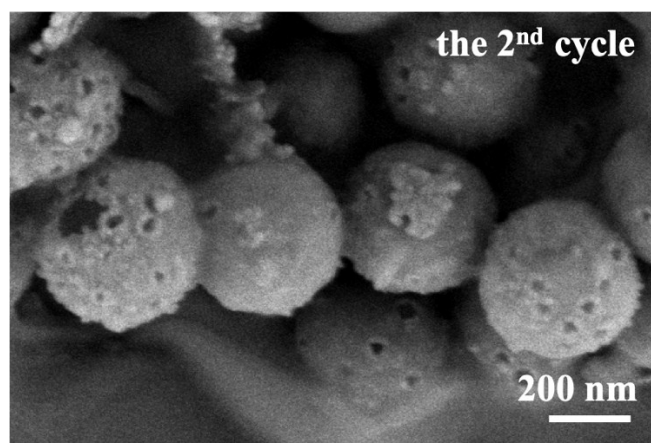

**Figure S6.** The SEM images of N-HCNs.

**Figure S7**

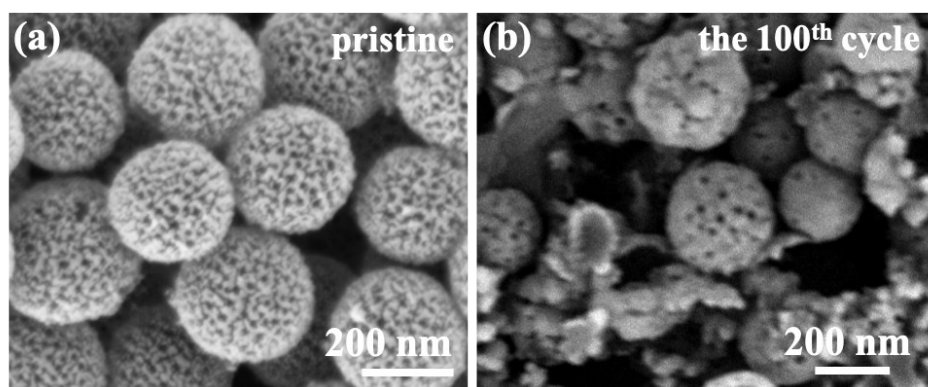

**Figure S7.** The SEM images of N-HCNs: (a) pristine and (b) after 100 cycles.

The morphology of the pristine and after cycling N-HCNs are carried out, as shown in Figure S7. As compared with the morphology of the pristine N-HCNs, there is no significant difference between before cycling and after cycling, except for the size of the pores. The change can be ascribed to the solid SEI on the surface of the N-HCNs, leading to low initial CE.

Figure S8

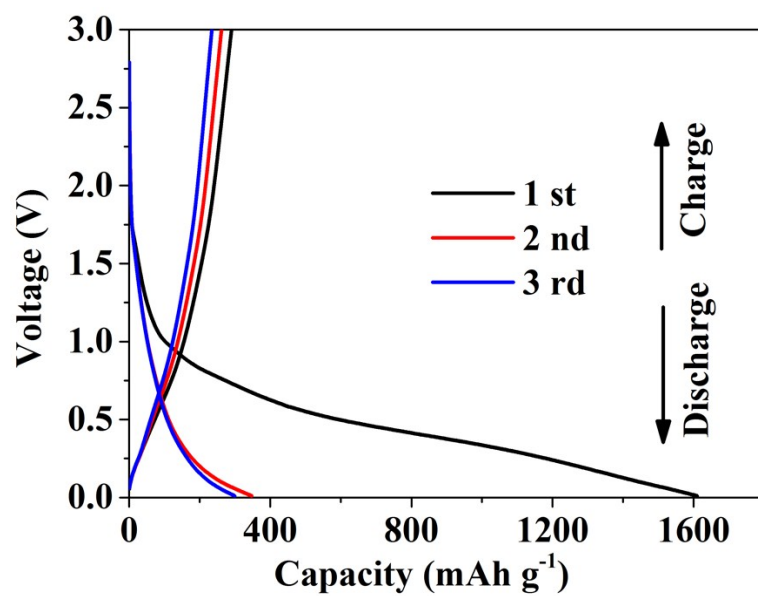

Figure S8. initial three discharge/charge profiles of N-CNs at 0.05 A g<sup>-1</sup>

Figure S9

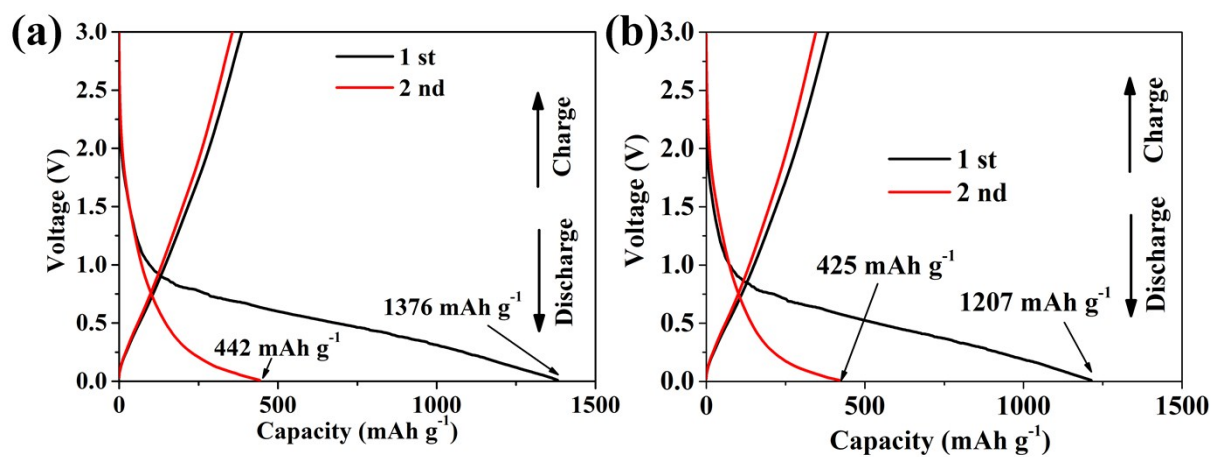

Figure S9. Initial two discharge/charge profiles of the N-HCNs based on the (a) cycle performance at  $50 \text{ mA g}^{-1}$  and (b) rate performance at  $50 \text{ mA g}^{-1}$ .

Figure S10

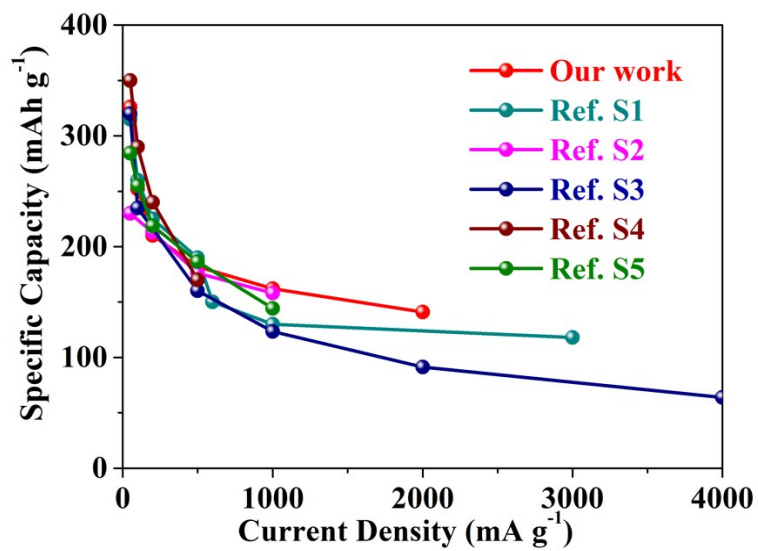

Figure S10. Comparison of rate capability of the N-HCNs and other carbonaceous materials in PIB.

**Figure S11**

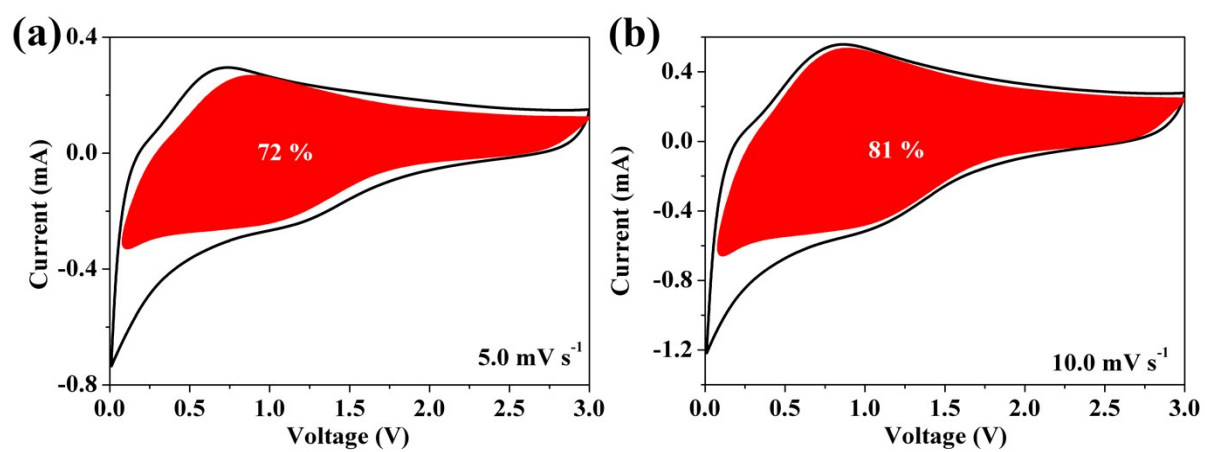

**Figure S11.** CV curve with the pseudocapacitive fraction shown by the red region at a scan rate of (a) 5.0 mV s<sup>-1</sup> and (a) 10.0 mV s<sup>-1</sup>.

Figure S12

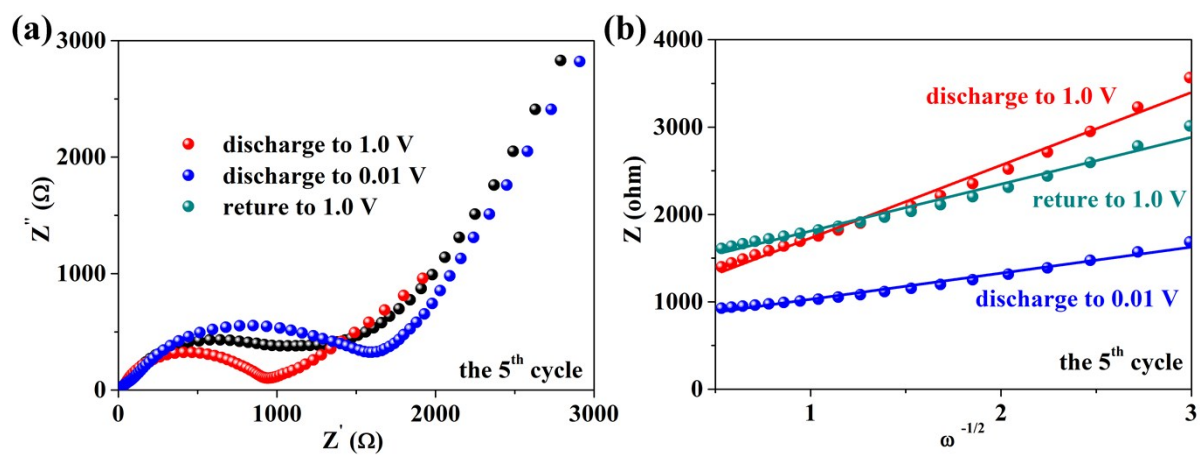

Figure S12. (e) Nyquist plots of N-HCNs at different potentials; (f) the linear relation of  $\omega^{1/2}$  vs.  $-Z''$ .

Figure S13

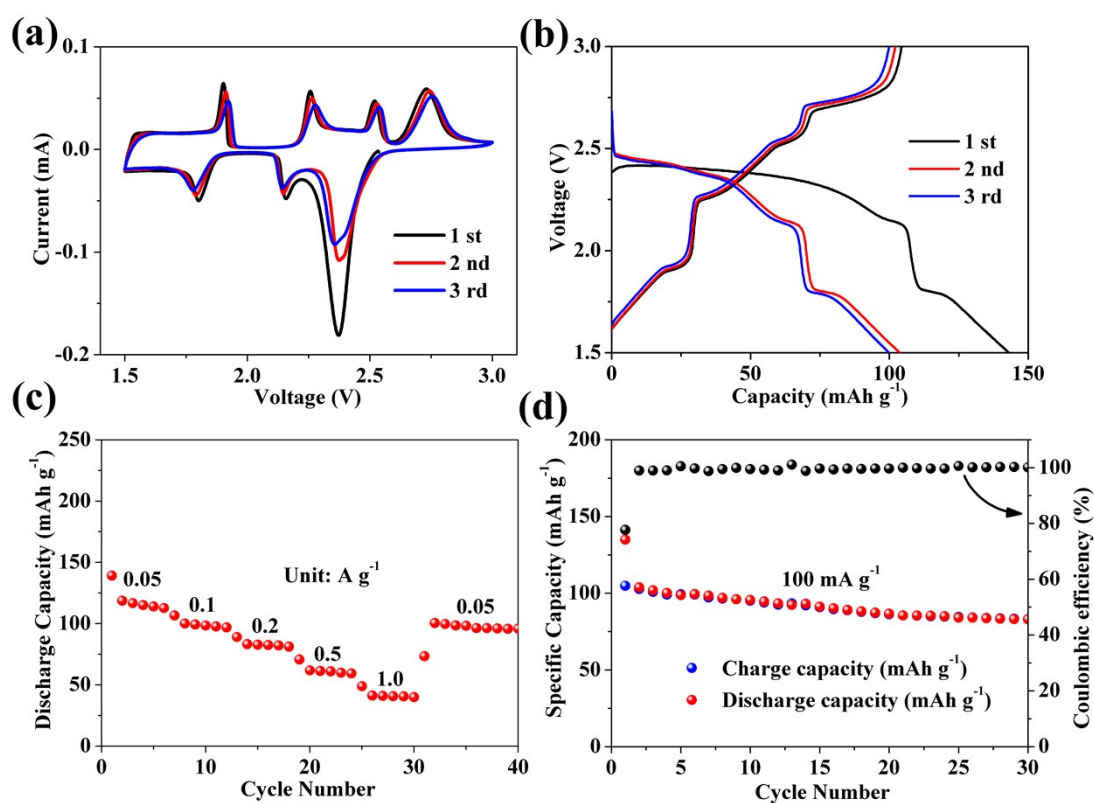

**Figure S13.** Electrochemical performance of commercial  $\text{TiS}_2$  as PIBs cathodes in half cells: (a) CV curves within the voltage window of 1.5-3.0 V at a scan rate of  $0.1 \text{ mV s}^{-1}$ ; (b) initial three discharge/charge profiles at  $0.1 \text{ A g}^{-1}$ ; (c) rate capability of at current rates of 0.05, 0.1, 0.2, 0.5, 1.0 and 2.0  $\text{A g}^{-1}$ ; (d) cycling property at  $0.1 \text{ A g}^{-1}$ .



Figure S14

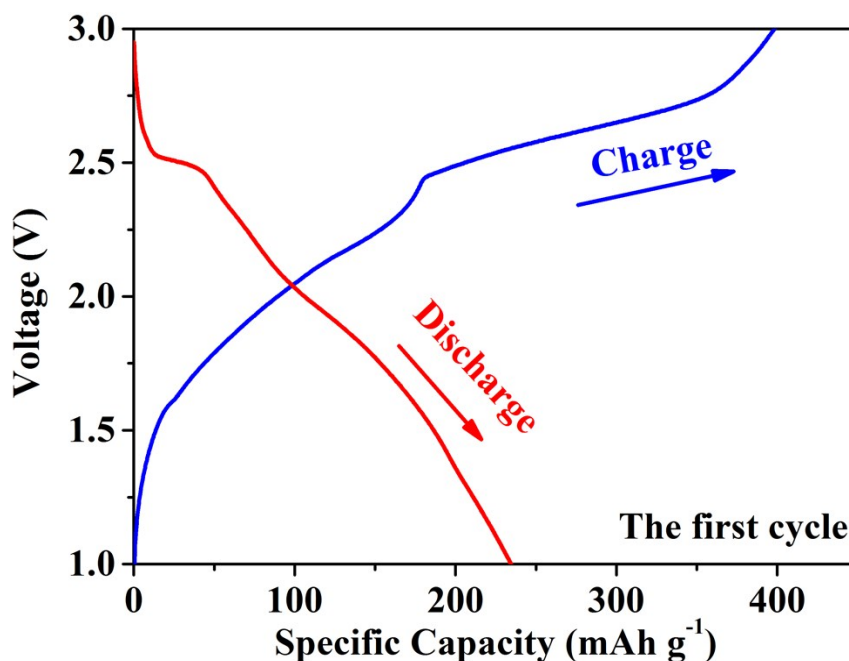

Figure S14. initial GDC profile of full-cell at 0.1 A g<sup>-1</sup>

**Reference:**

- [S1] J. Yang, Z. Ju, Y. Jiang, Z. Xing, B. Xi, J. Feng, S. Xiong, Enhanced Capacity and Rate Capability of Nitrogen/Oxygen Dual-Doped Hard Carbon in Capacitive Potassium-Ion Storage, *Adv. Mater.*, 30(2017)1700104. <https://doi.org/10.1002/adma.201700104>.
- [S2] M. Che, W. Wang, X. Liang, S. Gong, J. Liu, Q. Wang, S. Guo, H. Yang, Sulfur/Oxygen Codoped Porous Hard Carbon Microspheres for High-Performance Potassium-Ion Batteries, *Adv. Energy Mater.*, 8(2018)1800171. <https://doi.org/10.1002/aenm.201800171>.
- [S3] A. Mahmood, S. Li, Z. Ali, H. Tabassum, B. Zhu, Z. Liang, W. Meng, W. Aftab, W. Guo, H. Zhang, M. Yousaf, S. Gao, R. Zou, Y. Zhao, Ultrafast Sodium/Potassium-Ion Intercalation into Hierarchically Porous Thin Carbon Shells, *Adv. Mater.*, 31(2019) 1805430. <https://doi.org/10.1002/adma.201805430>.
- [S4] Z. Ju, P. Li, G. Ma, Z. Xing, Q. Zhuang, Y. Qian, Few Layer Nitrogen-Doped Graphene with Highly Reversible Potassium Storage, *Energy Storage Mater.*, 11(2018)38-46. <https://doi.org/10.1016/j.ensm.2017.09.009>.
- [S5] W. Wang, J. Zhou, Z. Wang, L. Zhao, P. Li, Y. Yang, C. Yang, H. Huang, S. Guo, Short-Range Order in Mesoporous Carbon Boosts Potassium-Ion Battery Performance, *Adv. Energy Mater.*, 8(2018)1701648. <https://doi.org/10.1002/aenm.201701648>.
